# Supplementary material for: The UDP-Glycosyltransferase Gene Family in Achelura yunnanensis (Lepidoptera: Zygaenidae): Identification, Phylogeny, and Diverse Expression Patterns
Source: MDPI journal article supplement (doi:10.3390/d14050407), 2022-05-21
Supplement: s1 [file s1]

**Table S1**

| Gene          | Primer sequence (5'-3')   |                        |
|---------------|---------------------------|------------------------|
|               | Forward primer            | Reverse primer         |
| <b>RT-PCR</b> |                           |                        |
| UGT1          | GATGCCGTACACCGCTAAGTC     | CACCGTTGACAGTTGGAGAGG  |
| UGT2          | CCGCTCTCAATATCCTTGGTG     | CGAGTCTTGAGTACGCCCATG  |
| UGT3          | GCGTGCTTGGA CTGTTTTCAC    | AGACACCGTTGACGATAACGC  |
| UGT4          | ACGGAGGAATTGATGAAGCAG     | GTATGGGATGCCTGGAAACAG  |
| UGT5          | GCTGTTGAAGGAACTGCACCT     | AGTTCTTCCAACGGTGGAATG  |
| UGT6          | CGTTTCGACCTTTTACGCAAG     | CGCCAGGAGTAATTCCAAATG  |
| UGT7          | CCAATAGGCCTAGAGCTGGCT     | ACCCCAAACGATGGAAAGTC   |
| UGT8          | GATGAAGCTGTTGGTAGCGGT     | GTGTT CAGCAGTATCCACGGC |
| UGT9          | CTGGGAGGAGCCACAACATAC     | CGTTTGGGACATACGAAGGAT  |
| UGT10         | CCTCATGATTACCATGGGAGG     | GAAACCTCTGCCAAAGAATGG  |
| UGT11         | GCCACGCTTATGTCAGGATTC     | CTGGAAAAATGTAAGCGGTGG  |
| UGT12         | CCTTCCAACAGCCATCACAAG     | GGATGAACGTCATCGGTATCG  |
| UGT13         | CAGTTCCGTTTAAAAGCCACC     | GATCGACTGCAGCTCCCATAT  |
| UGT14         | ATAGCCAAAGTTTTCGAAGCG     | CATTTGCTGGAACAGGTCGAT  |
| UGT15         | CACATGCTCCTTCTAATCGGC     | CAAGATCCACGAGTGTGGCTC  |
| UGT16         | TGACGTACCGCAGTTTTTTCC     | ATCTCTTCCGTACGGTAGGCC  |
| UGT17         | GTACCGTTCACGTCGAAATCC     | GATAGTCGCCAGCTGTAACGG  |
| UGT18         | GTTCCCAATGGCTTCAAAGAG     | CAATGTTGTATGCAGGGTTTCG |
| UGT19         | GCACGAGGTCGTCTCGATATC     | GTACAAATGCCGACCAACGAC  |
| UGT20         | GAAGCACTTAATCAATGCCGG     | GGCTTCGTCAACTAAACGCAG  |
| UGT21         | AGAAGCAAGGCACATGGTGAC     | GTACCCATAGCTCATGCCACC  |
| UGT22         | GATGCCCAAATTATTGCAGC      | ACACACGTTTTCTCCCAAT    |
| UGT23         | CACTGAATTCGAGCATCCGTC     | CTGTTGAAGATGAAGGCGTCC  |
| UGT24         | GGTGGTGTTCAGATAACGG       | AGTCATGTATGCTGGGTTCGG  |
| UGT25         | GCTGTATTTCCACACCTTCG      | CACTGGTGCACCGAATTTACC  |
| UGT26         | CTGGCGAGACAAGGTCATGAG     | ACACCGGATGTCTACTCACGG  |
| UGT27         | GAACGCCTGAAAATCTTGACG     | GCACATTGGTACCCAAACTGAC |
| UGT28         | CTGGGAGGAGCCACAACATAC     | CATCCAATGAGGCTCTACCGT  |
| UGT29         | GTTGCCGACAAACACAAGGAG     | GTACATAAGCGGTGGCCTCTG  |
| UGT30         | CGGTTACAAAACAGCTTGTG      | GGCACATCCTTGAGATCCTTG  |
| UGT31         | CACATGCTCCTTCTAATCGGC     | CAAGATCCACGAGTGTGGCTC  |
| RPL8          | CCTTGGCAGTAGTTCAC TTTTCGT | ACCACGAATTCTTCCTGTCCTG |
| <b>qPCR</b>   |                           |                        |
| UGT8          | CATCAGGTGACTTGGATAAC      | CCTTCAGTGCCTTTGTATAG   |
| UGT9          | TAGGAGAAGGTGTTGTGAG       | CCTGGCATAGGACTAATGT    |

---

|       |                      |                      |
|-------|----------------------|----------------------|
| UGT12 | TATAAAGGCACTGGAGGTC  | CGTCACTGAAGAACCATTC  |
| UGT18 | GTACCAGTGATAGGTCTACC | GTATGGCAACACGAAGTC   |
| UGT25 | CCTACCATCTTGAGACAGAG | CGTTGAATCGTGGCATATC  |
| UGT30 | GAATGAAGAACGCTGTGAG  | CATTGATGCTGAAGTGAGAG |
| RPS4  | GATTGTGTCCCGTGAAAG   | AGTGAGATGTACGCCTTC   |
| RPL8  | ACCCAGTTGAACATCCTC   | GCAATAAGACCGACCTTG   |

---
